# Supplementary material for: Photosensitizer-loaded cell membrane biomimetic nanoparticles for enhanced tumor synergetic targeted therapy
Source: Royal Society of Chemistry journal article supplement (doi:10.1039/c9ra08926h), 2020-01-01
Supplement: c9ra08926h1.pdf [file c9ra08926h1.pdf]

## *Supporting information of*

# **Photosensitizer-Loaded Cell Membrane Biomimetic Nanoparticles for Enhanced Tumor Synergetic Targeted Therapy**

Yunjiao Zhang,<sup>a\*</sup> Nan Ma M.D. Ph.D,<sup>a\*</sup> Congcong Luo,<sup>a</sup> Jiaquan Zhu,<sup>a#</sup> and Chunrong Bao<sup>a#</sup>

a. Department of Cardiothoracic Surgery, Xinhua Hospital, School of Medicine, Shanghai Jiao Tong University, Shanghai (200092), P.R.China, baochunrong@xinhumed.com.cn;

\* Yunjiao Zhang and Nan Ma contributed equally to this manuscript.

# Corresponding author: Chunrong Bao, baochunrong@xinhumed.com.cn; Jiaquan Zhu, zhujiaquan@xinhumed.com.cn

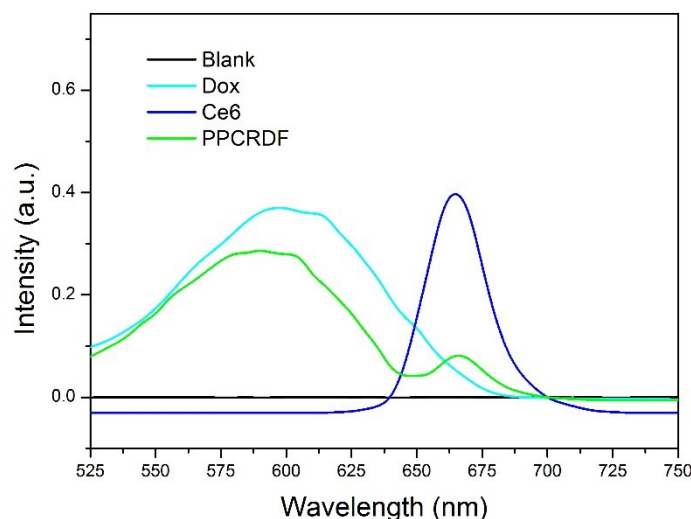

*Supplemental Figure 1. The fluorescence absorption of Dox, Ce6 and PPCRDF nanoparticles.*
